# Supplementary material for: Rapid conversion of highly porous borate glass microspheres into hydroxyapatite
Source: Royal Society of Chemistry journal article supplement (doi:10.1039/d0bm01776k), 2021-01-01
Supplement: d0bm01776k1.pdf [file d0bm01776k1.pdf]

Electronic Supplementary Information

## Rapid Conversion of Highly Porous Borate Glass Microspheres into Hydroxyapatite

*Md Towhidul Islam<sup>a,c</sup>, Laura Macri-Pellizzeri<sup>b</sup>, Virginie Sottile<sup>b,d</sup> and Ifty Ahmed<sup>a\*</sup>*

<sup>a</sup> *Advanced Materials Research Group, Faculty of Engineering, University of Nottingham,  
Nottingham, NG7 2RD, UK*

<sup>b</sup> *Wolfson STEM Centre, Division of Cancer and Stem Cells, School of Medicine, University of  
Nottingham, Nottingham NG7 2UH, UK*

<sup>c</sup> *Department of Applied Chemistry and Chemical Engineering, Faculty of Engineering,  
Noakhali Science and Technology University, Noakhali-3814, Bangladesh*

<sup>d</sup> *Department of Molecular Medicine, The University of Pavia, 27100 Pavia, Italy*

**Corresponding Author**

*\*email: Ifty.Ahmed@nottingham.ac.uk*

ESI Figures

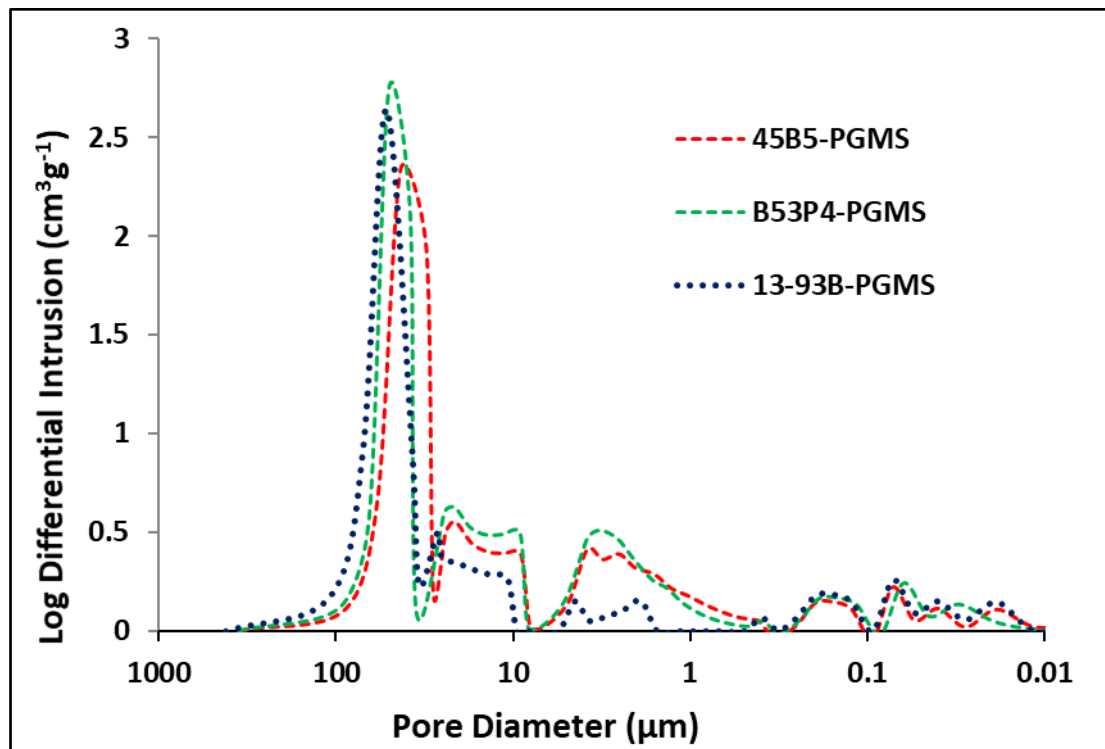

*ESI Figure 1: Pore diameters measured using mercury porosimetry showing Log differential pore volume for porous 45B5, B53P4 and 13-93B borate glass microspheres.*

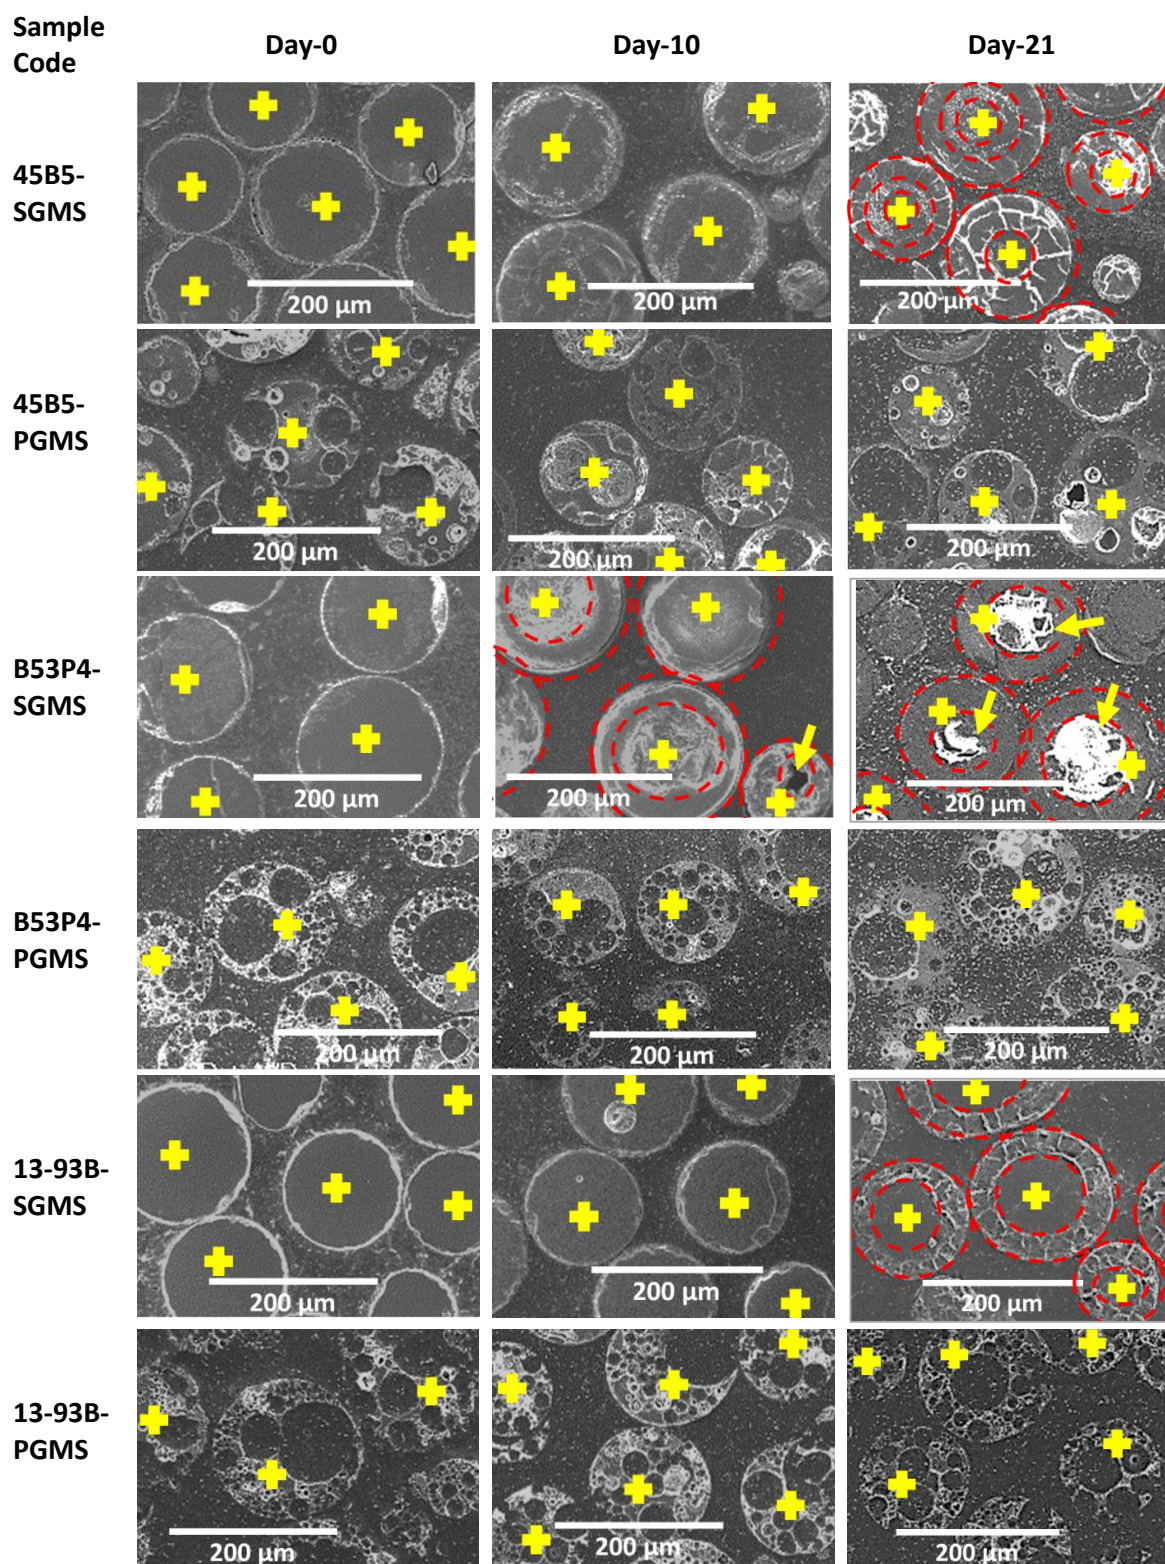

**ESI Figure 2:** Cross-sectional analysis for SGMS and PGMS from borate glasses prepared at day 0 (starting microspheres), day-10 and day-21 during the immersion of microspheres in 0.02 M  $K_2HPO_4$  solution at 37 °C. EDX analysis conducted at the core of microspheres presented as '+' symbol.

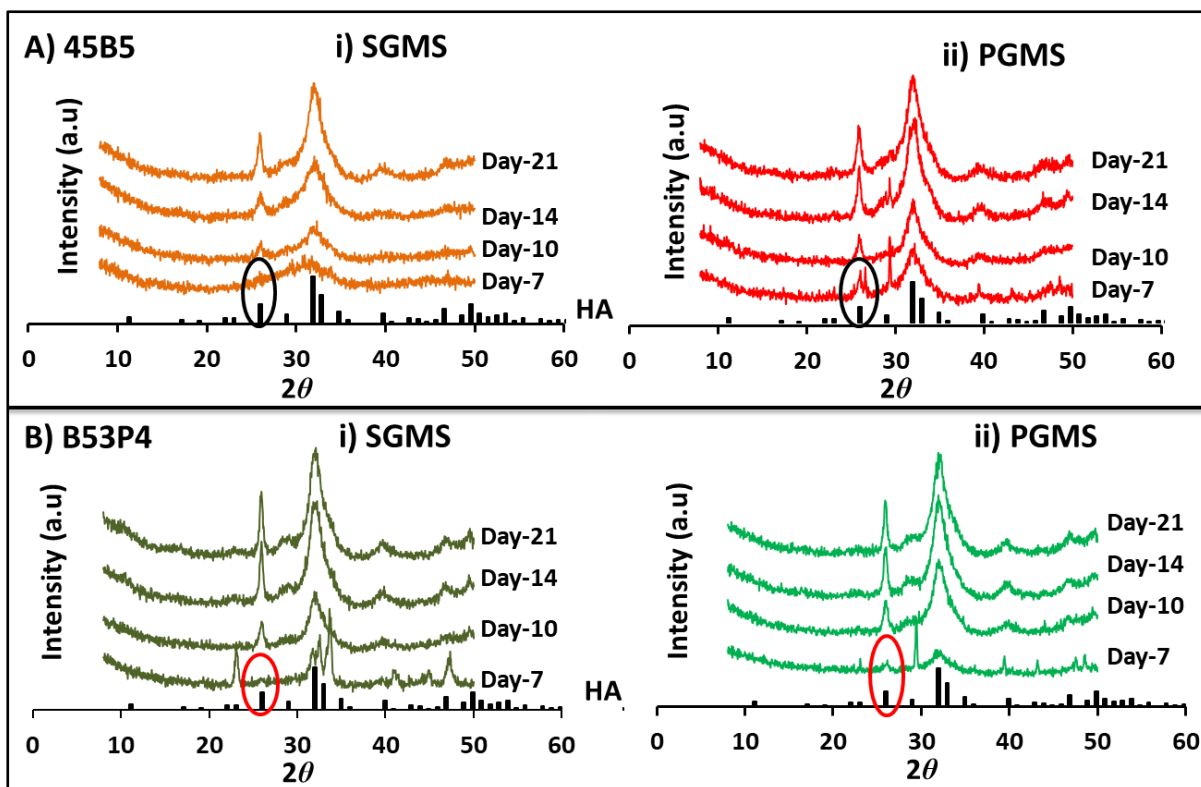

**ESI Figure 3:** X-ray diffraction patterns for SGMS and PGMS of **A) 45B5** and **B) B53P4** post immersion in SBF at 37 °C up to day 21. XRD spectra for HA is also shown at the bottom of each Figure for comparison.

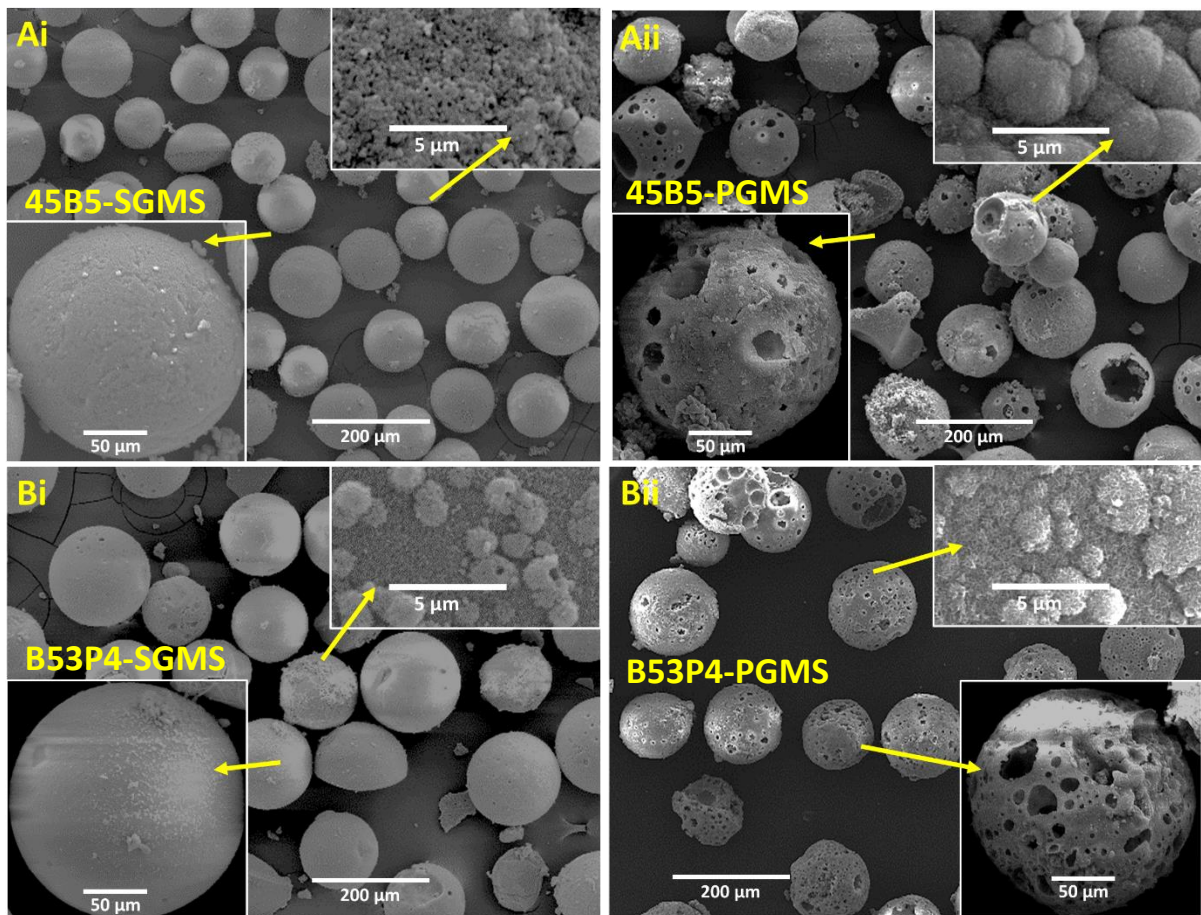

**ESI Figure 4:** SEM images Ai and Bi for SGMS and Aii and Bii for PGMS of 45B5 and B53P4 glasses post immersion in SBF at 37 °C at day 21. Inset images shown at higher magnification.

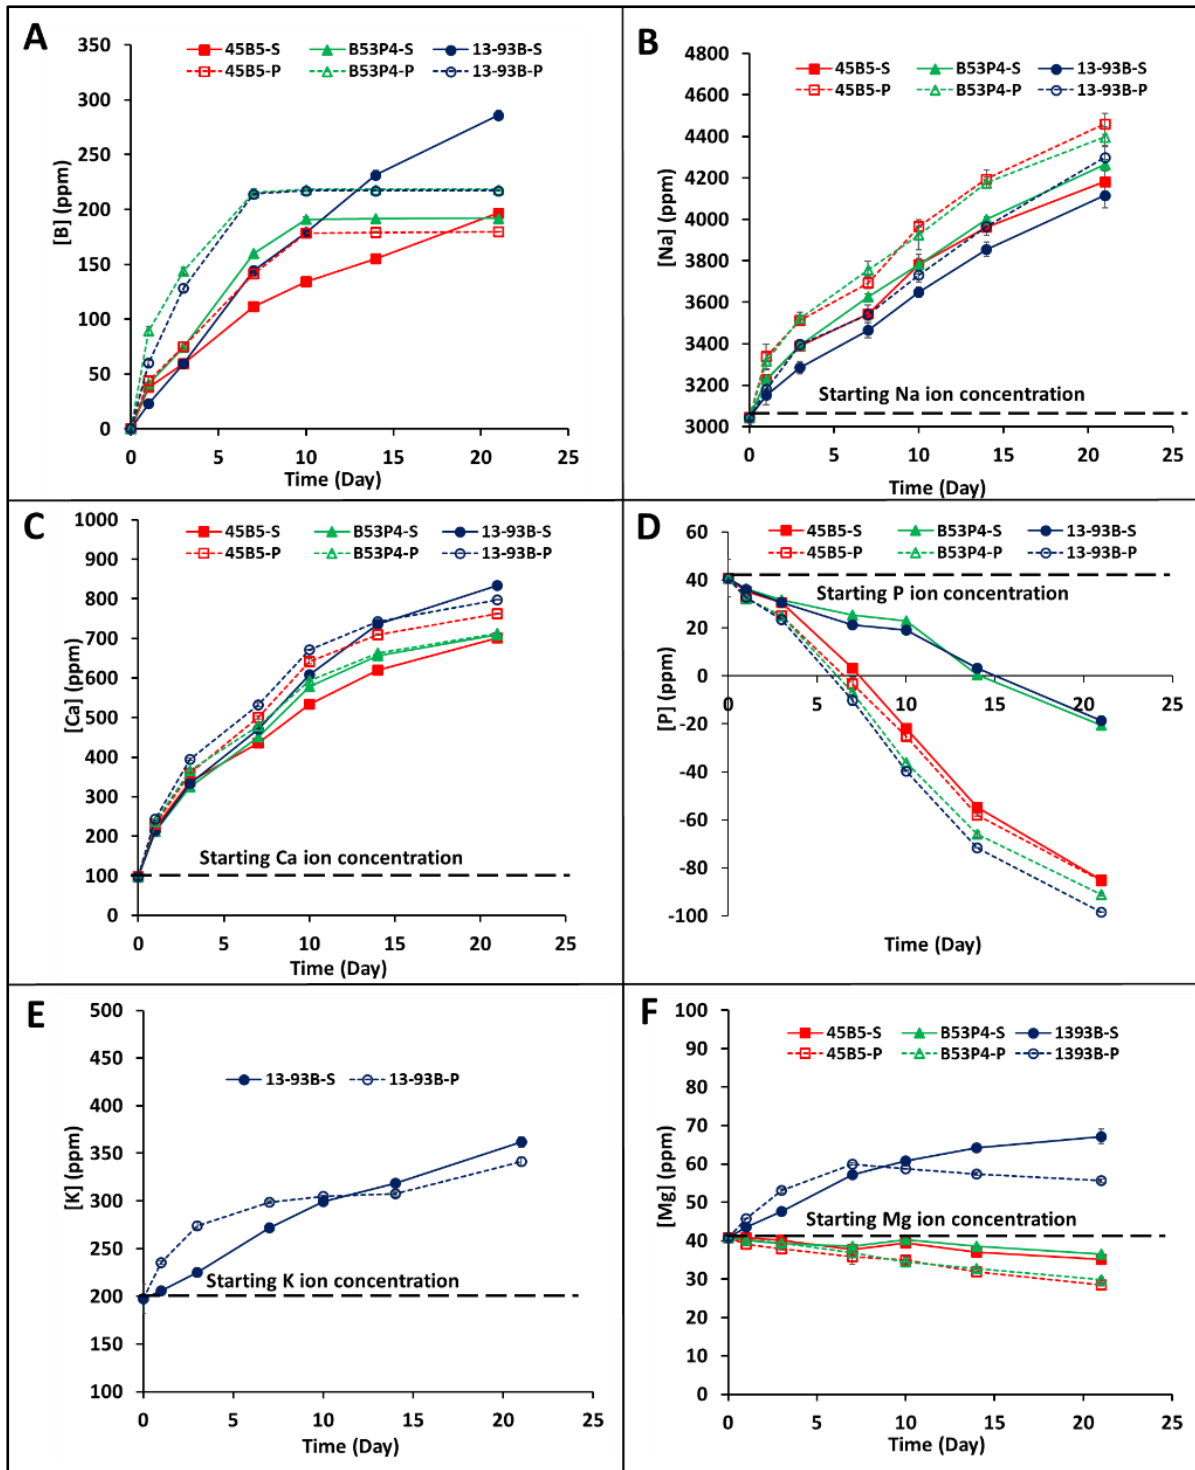

**ESI Figure 5:** Cumulative ion release profiles over 21 days immersion in SBF for A) Borate, B) Sodium, C) Calcium, D) Phosphate, E) Potassium and F) Magnesium ions as measured via ICP-MS for both SGMS and PGMS from the glasses investigated. (Error bars are also included in the data above). Black dashed lines represent the starting ion concentrations in the solution.

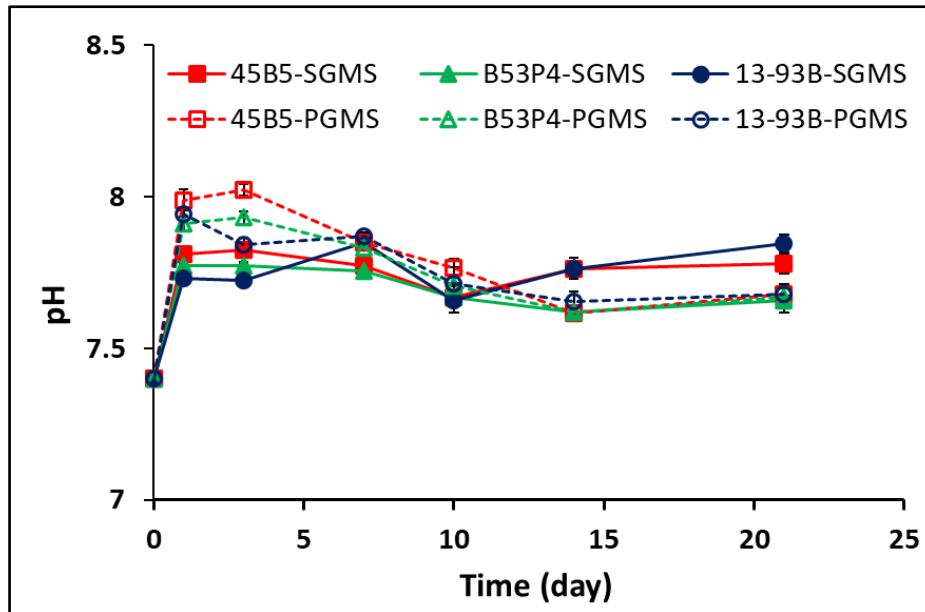

**ESI Figure 6:** pH change as a function of immersion time (days) for the SGMS (represented as solid symbols) and PGMS (represented as open symbols) of the borate glasses investigated in SBF at 37 °C, over 21 days duration.

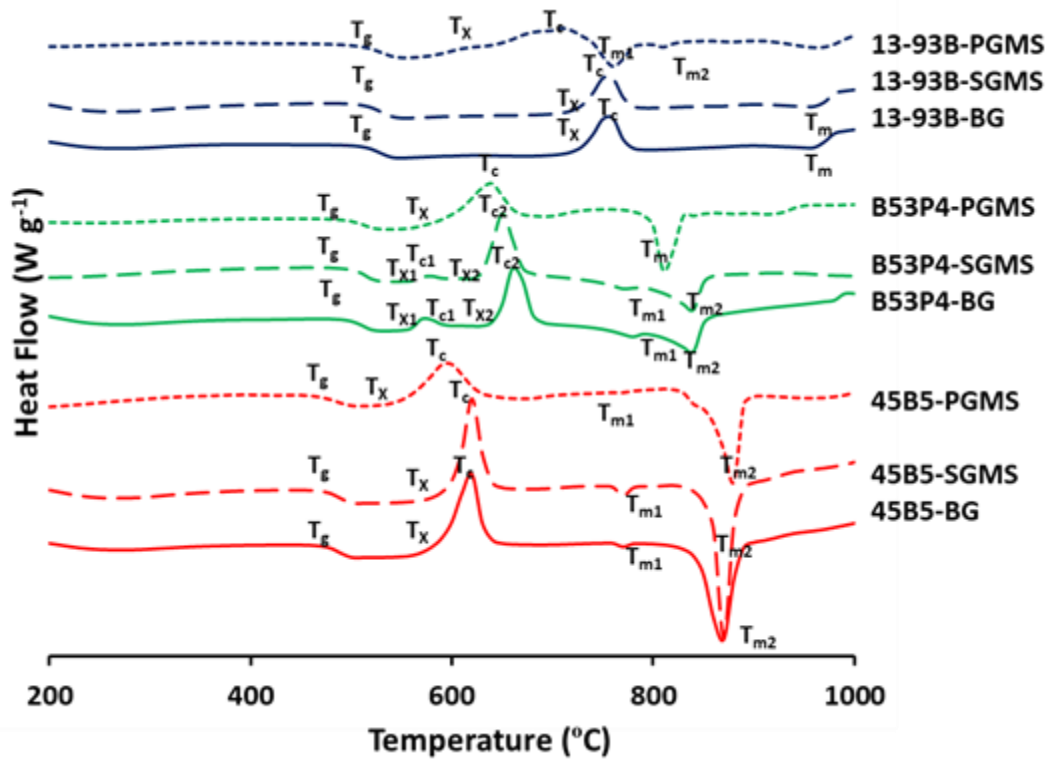

*ESI Figure 7: DSC curves for the starting glass particles (BG), SGMS and PGMS of 45B5, B53P4 and 13-93B. Bulk glass (BG) is depicted as solid line, solid glass microspheres (SGMS) shown as dashed line and the porous glass microspheres (PGMS) are shown as the dotted line.*



## ESI Tables

**ESI Table 1:** Compositional analysis for SGMS and PGMS of borate glasses investigated post immersion in SBF at day 21.

| Components                        | 45B5           |                | B53P4          |                | 13-93B         |                |
|-----------------------------------|----------------|----------------|----------------|----------------|----------------|----------------|
|                                   | SGMS<br>(mol%) | PGMS<br>(mol%) | SGMS<br>(mol%) | PGMS<br>(mol%) | SGMS<br>(mol%) | PGMS<br>(mol%) |
| <b>B<sub>2</sub>O<sub>3</sub></b> | 1.05 ± 0.91    | 0.15 ± 0.03    | 0.23 ± 0.04    | 0.10 ± 0.01    | 4.27 ± 2.73    | 0.08 ± 0.01    |
| <b>P<sub>2</sub>O<sub>5</sub></b> | 23.45 ± 0.45   | 24.37 ± 0.15   | 24.77 ± 0.26   | 24.26 ± 0.19   | 22.93 ± 2.37   | 24.45 ± 0.35   |
| <b>CaO</b>                        | 72.85 ± 1.01   | 71.56 ± 0.14   | 70.92 ± 0.46   | 71.72 ± 0.32   | 68.51 ± 3.45   | 71.69 ± 0.53   |
| <b>Na<sub>2</sub>O</b>            | 0.48 ± 0.23    | 0.73 ± 0.10    | 0.82 ± 0.02    | 0.76 ± 0.02    | 0.62 ± 0.25    | 0.70 ± 0.04    |
| <b>MgO</b>                        | 2.15 ± 1.1     | 3.17 ± 0.12    | 3.23 ± 0.22    | 3.13 ± 0.15    | 3.34 ± 0.02    | 3.05 ± 0.22    |
| <b>K<sub>2</sub>O</b>             | -              | -              | -              | -              | 0.33 ± 0.22    | 0.02 ± 0.01    |

**ESI Table 2:** Glass transition ( $T_g$ ), onset of crystallisation ( $T_x$ ), glass stability ( $\Delta T$ ), crystallisation peak ( $T_c$ ) and melting temperature ( $T_m$ ) for BG, SGMS and PGMS of different borate glass formulations, using a  $20\text{ }^\circ\text{C min}^{-1}$  heating rate.

| Glass Formulations | Glass transition $T_g$ ( $^\circ\text{C}$ ) | Onset crystallisation $T_{x1}$ ( $^\circ\text{C}$ )/ $T_{x2}$ ( $^\circ\text{C}$ ) | Glass stability $\Delta T = (T_x - T_g)$ $^\circ\text{C}$ | Crystallisation Temperature $T_{c1}$ ( $^\circ\text{C}$ )/ $T_{c2}$ ( $^\circ\text{C}$ ) | Melting Temperature $T_{m1}$ ( $^\circ\text{C}$ )/ $T_{m2}$ ( $^\circ\text{C}$ ) |
|--------------------|---------------------------------------------|------------------------------------------------------------------------------------|-----------------------------------------------------------|------------------------------------------------------------------------------------------|----------------------------------------------------------------------------------|
| <b>45B5-BG</b>     | $484 \pm 2$                                 | $588 \pm 3$                                                                        | 104                                                       | $620 \pm 2/-$                                                                            | $769 \pm 2/873 \pm 5$                                                            |
| <b>45B5-SGMS</b>   | $485 \pm 2$                                 | $590 \pm 3$                                                                        | 105                                                       | $623 \pm 2/-$                                                                            | $769 \pm 3/869 \pm 4$                                                            |
| <b>45B5-PGMS</b>   | $484 \pm 3$                                 | $549 \pm 2$                                                                        | 65                                                        | $596 \pm 2/-$                                                                            | $767 \pm 3/877 \pm 3$                                                            |
| <b>B53P4-BG</b>    | $508 \pm 3$                                 | $559 \pm 3/641 \pm 2$                                                              | 52                                                        | $573 \pm 3/664 \pm 2$                                                                    | $779 \pm 3/840 \pm 4$                                                            |
| <b>B53P4-SGMS</b>  | $510 \pm 2$                                 | $562 \pm 2/628 \pm 3$                                                              | 52                                                        | $575 \pm 2/652 \pm 2$                                                                    | $774 \pm 2/840 \pm 3$                                                            |
| <b>B53P4-PGMS</b>  | $512 \pm 2$                                 | $560 \pm 2$                                                                        | 48                                                        | $-/638 \pm 3$                                                                            | $813 \pm 4/-$                                                                    |
| <b>13-93B-BG</b>   | $526 \pm 3$                                 | $724 \pm 3$                                                                        | 198                                                       | $756 \pm 2/-$                                                                            | $964 \pm 5/-$                                                                    |
| <b>13-93B-SGMS</b> | $527 \pm 3$                                 | $726 \pm 2$                                                                        | 199                                                       | $755 \pm 2/-$                                                                            | $966 \pm 4/-$                                                                    |
| <b>13-93B-PGMS</b> | $526 \pm 2$                                 | $584 \pm 2$                                                                        | 58                                                        | $711 \pm 2/-$                                                                            | $762 \pm 3/809 \pm 4$                                                            |
